# Supplementary material for: Multifaceted characterization of the signatures and efficacy of mesenchymal stem/stromal cells in acquired aplastic anemia
Source: PubMed Central journal article supplement (PMC7020384; doi:10.1186/s13287-020-1577-2), 2020-02-13

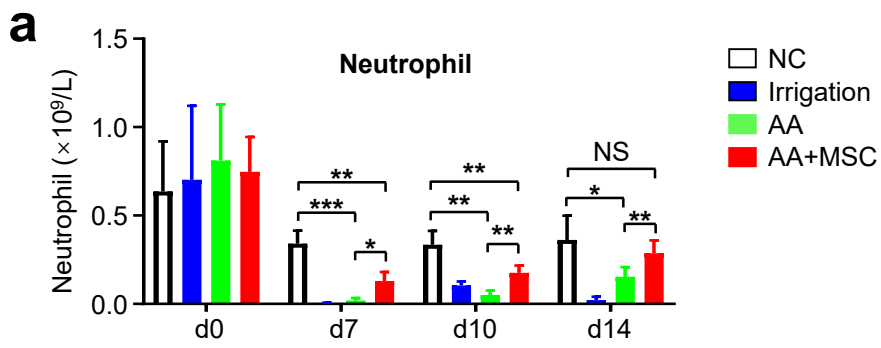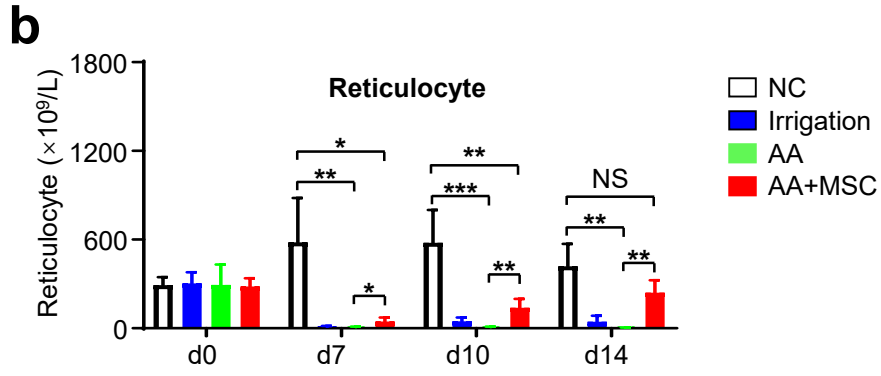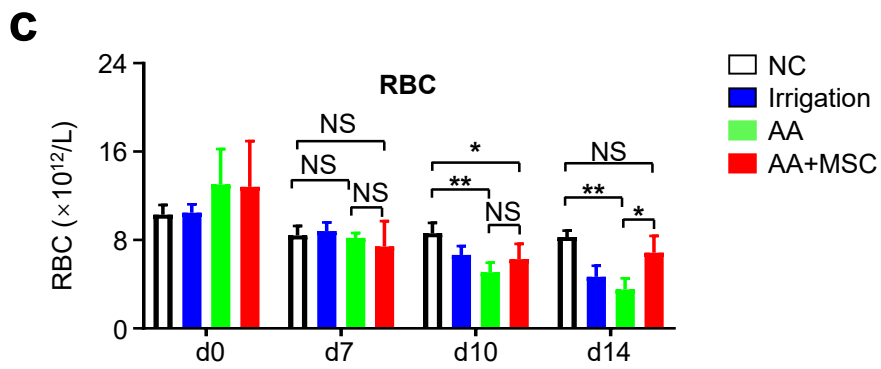

Supplement: 13287_2020_1577_MOESM4_ESM.pdf [file 13287_2020_1577_MOESM4_ESM.pdf]
